# Supplementary material for: Optimization and Application of Real-Time qPCR Assays in Detection and Identification of Chlamydiales in Products of Domestic Ruminant Abortion
Source: MDPI journal article supplement (doi:10.3390/pathogens12020290), 2023-02-09
Supplement: s1 [file s1]

### Supplementary tables – Limit of detection

**Sensitivity: Synthetic controls: Limit of detection in placenta, abomasal fluid and lung. Testing foetal tissues and placenta spiked with the synthetic DNA fragment of interest.**

#### Pan-Chlamydiales qPCR

**Table S2.** Results of analysis of spiked placenta DNA.

| Sample: Placenta |                                           |
|------------------|-------------------------------------------|
| DNA copies       | C <sub>T</sub> (Target: Pan-Chlamydiales) |
| 500              | 34,74                                     |
| 500              | 34,79                                     |
| 500              | 34,52                                     |
| 500              | 34,32                                     |
| 500              | 34,79                                     |
| 500              | 36,89                                     |
| 250              | 31,08                                     |
| 250              | 30,86                                     |
| 250              | 30,72                                     |
| 250              | 30,81                                     |
| 250              | 30,83                                     |
| 250              | 30,90                                     |
| 125              | 30,46                                     |
| 125              | 30,67                                     |
| 125              | 30,21                                     |
| 125              | 30,60                                     |
| 125              | 30,72                                     |
| 125              | 32,04                                     |
| 62,5             | 30,27                                     |
| 62,5             | 30,13                                     |
| 62,5             | 29,99                                     |
| 62,5             | 30,27                                     |
| 62,5             | 30,51                                     |
| 62,5             | 30,52                                     |

**Table S3.** Results of analysis of spiked stomach content DNA.

| Sample: Stomach content |                                           |
|-------------------------|-------------------------------------------|
| DNA copies              | C <sub>T</sub> (Target: Pan-Chlamydiales) |
| 500                     | 35,15                                     |
| 500                     | 35,96                                     |
| 500                     | 34,35                                     |
| 500                     | 35,26                                     |
| 500                     | 35,27                                     |

|      |              |
|------|--------------|
| 500  | Undetermined |
| 250  | 36,47        |
| 250  | 36,06        |
| 250  | 35,38        |
| 250  | Undetermined |
| 250  | 35,59        |
| 250  | 35,44        |
| 125  | 36,08        |
| 125  | 35,39        |
| 125  | 35,23        |
| 125  | 35,94        |
| 125  | 35,15        |
| 125  | 35,25        |
| 62,5 | 35,51        |
| 62,5 | 35,91        |
| 62,5 | 35,58        |
| 62,5 | 35,60        |
| 62,5 | 33,99        |
| 62,5 | 36,47        |

**Table S4.** Results of analysis of spiked lung DNA.

| <b>Limit of detection: Lung</b> |                                      |
|---------------------------------|--------------------------------------|
| <b>DNA copies</b>               | <b>Ct (Target: Pan-Chlamydiales)</b> |
| 1000                            | 32,12                                |
| 1000                            | 32,38                                |
| 1000                            | 32,17                                |
| 1000                            | 32,61                                |
| 1000                            | 32,36                                |
| 1000                            | 32,47                                |
| 500                             | 32,49                                |
| 500                             | 32,61                                |
| 500                             | 33,17                                |
| 500                             | 33,58                                |
| 500                             | 33,81                                |
| 500                             | 33,64                                |
| 250                             | 34,14                                |
| 250                             | 35,43                                |
| 250                             | 35,19                                |
| 250                             | 33,94                                |
| 250                             | 34,99                                |
| 250                             | 34,98                                |
| 125                             | 36,00                                |
| 125                             | 35,96                                |
| 125                             | 35,27                                |

|     |       |
|-----|-------|
| 125 | 36,01 |
| 125 | 36,02 |
| 125 | 35,92 |

**Limit of detection: *C. abortus*/*C. pecorum* assay**

**Table S5.** Results of analysis of spiked placenta DNA.

| <b>Sample: Placenta</b> |                                                  |                                                  |
|-------------------------|--------------------------------------------------|--------------------------------------------------|
| <b>DNA copies</b>       | <b>C<sub>T</sub> (Target: <i>C. abortus</i>)</b> | <b>C<sub>T</sub> (Target: <i>C. pecorum</i>)</b> |
| 10                      | 33,31                                            | 32,94                                            |
| 10                      | 33,73                                            | 33,10                                            |
| 10                      | 32,70                                            | 32,28                                            |
| 10                      | 32,79                                            | 32,34                                            |
| 10                      | 33,52                                            | 32,87                                            |
| 10                      | 33,76                                            | 33,18                                            |
| 5                       | 34,22                                            | 33,51                                            |
| 5                       | 35,28                                            | 34,53                                            |
| 5                       | 33,62                                            | 32,74                                            |
| 5                       | 34,43                                            | 33,38                                            |
| 5                       | 37,05                                            | 35,08                                            |
| 5                       | Undetermined                                     | Undetermined                                     |
| 2                       | 34,51                                            | 34,04                                            |
| 2                       | 35,28                                            | 34,42                                            |
| 2                       | 33,84                                            | 33,39                                            |
| 2                       | 35,69                                            | 34,98                                            |
| 2                       | Undetermined                                     | Undetermined                                     |
| 2                       | Undetermined                                     | Undetermined                                     |
| 1                       | 37,51                                            | 36,94                                            |
| 1                       | 35,18                                            | 34,69                                            |
| 1                       | 36,79                                            | 34,79                                            |
| 1                       | 35,95                                            | 33,95                                            |
| 1                       | 37,27                                            | 36,56                                            |
| 1                       | 35,82                                            | 33,90                                            |

**Table S6.** Results of analysis of spiked stomach content DNA.

| <b>Sample: Stomach content</b> |                                                  |                                                  |
|--------------------------------|--------------------------------------------------|--------------------------------------------------|
| <b>DNA copies</b>              | <b>C<sub>T</sub> (Target: <i>C. abortus</i>)</b> | <b>C<sub>T</sub> (Target: <i>C. pecorum</i>)</b> |
| 10                             | 36,49                                            | 35,58                                            |
| 10                             | 33,57                                            | 32,99                                            |
| 10                             | 34,39                                            | 34,55                                            |

|    |              |              |
|----|--------------|--------------|
| 10 | 35,60        | 36,60        |
| 10 | 34,75        | 34,63        |
| 10 | 35,49        | 34,96        |
| 5  | 34,04        | 34,07        |
| 5  | 34,07        | 33,21        |
| 5  | 34,72        | 33,68        |
| 5  | 37,10        | 36,25        |
| 5  | Undetermined | 37,14        |
| 5  | 34,97        | 33,93        |
| 2  | 34,74        | 34,75        |
| 2  | Undetermined | Undetermined |
| 2  | Undetermined | Undetermined |
| 2  | 35,87        | 35,23        |
| 2  | 35,63        | 34,33        |
| 2  | 34,85        | 33,80        |
| 1  | 35,92        | 35,53        |
| 1  | 34,67        | 34,02        |
| 1  | 36,39        | 35,94        |
| 1  | 36,99        | 36,29        |
| 1  | 35,63        | 36,64        |
| 1  | 36,30        | 35,17        |

**Table S7.** Results of analysis of spiked lung DNA.

| <b>Tissue DNA: Lung</b> |                                                  |                                                  |
|-------------------------|--------------------------------------------------|--------------------------------------------------|
| <b>DNA copies</b>       | <b>C<sub>T</sub> (Target: <i>C. abortus</i>)</b> | <b>C<sub>T</sub> (Target: <i>C. pecorum</i>)</b> |
| 10                      | 32,79                                            | 32,53                                            |
| 10                      | 32,28                                            | 31,86                                            |
| 10                      | 32,96                                            | 32,28                                            |
| 10                      | 34,91                                            | 34,82                                            |
| 10                      | 34,36                                            | 34,09                                            |
| 10                      | 33,36                                            | 33,73                                            |
| 5                       | 34,61                                            | 33,89                                            |
| 5                       | 34,27                                            | 34,41                                            |
| 5                       | 34,58                                            | 34,73                                            |
| 5                       | 33,99                                            | 34,10                                            |
| 5                       | 34,68                                            | 34,43                                            |
| 5                       | 34,51                                            | 33,68                                            |
| 2                       | 34,65                                            | 34,35                                            |
| 2                       | 35,61                                            | 34,54                                            |
| 2                       | 17,11                                            | 32,34                                            |
| 2                       | 35,21                                            | 35,68                                            |
| 2                       | 34,65                                            | 34,08                                            |

|   |              |              |
|---|--------------|--------------|
| 2 | 37,74        | 37,16        |
| 1 | Undetermined | 35,56        |
| 1 | 35,85        | 34,60        |
| 1 | Undetermined | Undetermined |
| 1 | 34,56        | 35,63        |
| 1 | Undetermined | 35,82        |
| 1 | 35,17        | 37,492       |

***Parachlamydia/Waddlia* qPCR assay**

**Table S8.** Results of analysis of spiked placenta DNA.

| DNA copies (log) | C <sub>T</sub> (Target: <i>Parachlamydia</i> ) | C <sub>T</sub> (Target <i>Waddlia</i> ) |
|------------------|------------------------------------------------|-----------------------------------------|
| 10               | 35,18                                          | 33,01                                   |
| 10               | 33,96                                          | 35,15                                   |
| 10               | Undetermined                                   | 34,00                                   |
| 10               | 34,30                                          | 33,72                                   |
| 10               | 36,23                                          | 33,67                                   |
| 10               | 36,74                                          | 33,72                                   |
| 5                | 33,96                                          | 34,50                                   |
| 5                | 34,58                                          | 34,81                                   |
| 5                | 34,83                                          | 34,04                                   |
| 5                | 34,66                                          | 34,84                                   |
| 5                | 33,78                                          | 34,31                                   |
| 5                | 33,72                                          | 34,41                                   |
| 2                | 34,87                                          | 36,34                                   |
| 2                | 35,80                                          | 35,61                                   |
| 2                | 35,34                                          | 36,31                                   |
| 2                | 34,37                                          | 35,64                                   |
| 2                | 34,91                                          | 34,33                                   |
| 2                | 34,72                                          | 34,67                                   |
| 1                | 34,75                                          | 36,26                                   |
| 1                | 34,44                                          | 35,41                                   |
| 1                | 35,44                                          | 35,65                                   |
| 1                | 36,41                                          | 36,17                                   |
| 1                | 34,35                                          | 36,87                                   |
| 1                | 35,66                                          | Undetermined                            |

**Table S9.** Results of analysis of spiked stomach content DNA.

| DNA copies (log) | Ct (Target <i>Parachlamydia</i> ) | Ct (Target: <i>Waddlia</i> ) |
|------------------|-----------------------------------|------------------------------|
| 10               | 30,75                             | 31,76                        |
| 10               | 30,75                             | 31,85                        |
| 10               | 30,83                             | 31,72                        |
| 10               | 30,76                             | 32,26                        |
| 10               | 30,27                             | 31,79                        |
| 10               | 30,34                             | 31,58                        |
| 5                | 34,96                             | 35,52                        |
| 5                | 31,65                             | 32,77                        |
| 5                | 31,62                             | 32,76                        |
| 5                | 30,78                             | 32,22                        |
| 5                | 31,43                             | 32,89                        |
| 5                | 31,55                             | 32,61                        |
| 2                | 33,23                             | 34,52                        |
| 2                | 32,64                             | 34,29                        |
| 2                | 32,77                             | 34,09                        |
| 2                | 34,91                             | 36,99                        |
| 2                | 32,38                             | 33,51                        |
| 2                | 32,98                             | 34,33                        |
| 1                | 34,58                             | 34,59                        |
| 1                | 33,48                             | 35,18                        |
| 1                | 32,88                             | 34,35                        |
| 1                | 33,26                             | 34,80                        |
| 1                | 33,32                             | 35,20                        |
| 1                | 33,61                             | 35,34                        |

**Table S10.** Results of analysis of spiked lung DNA.

| DNA copies (log) | Ct (Target: <i>Parachlamydia</i> ) | Ct (Target: <i>Waddlia</i> ) |
|------------------|------------------------------------|------------------------------|
| 10               | 27,90                              | 28,75                        |
| 10               | 27,87                              | 28,76                        |
| 10               | 27,59                              | 28,60                        |
| 10               | 27,67                              | 28,75                        |
| 10               | 27,79                              | 28,59                        |
| 10               | 27,90                              | 28,49                        |
| 5                | 30,85                              | 29,62                        |
| 5                | 31,17                              | 29,16                        |
| 5                | 30,57                              | 29,16                        |
| 5                | 30,04                              | 28,69                        |
| 5                | 30,73                              | 29,48                        |
| 5                | 30,17                              | 29,83                        |
| 2                | 31,51                              | 30,02                        |
| 2                | 30,96                              | 30,78                        |

|   |       |       |
|---|-------|-------|
| 2 | 31,19 | 31,11 |
| 2 | 30,28 | 30,73 |
| 2 | 30,33 | 30,68 |
| 2 | 32,14 | 30,85 |
| 1 | 33,32 | 31,78 |
| 1 | 31,68 | 31,44 |
| 1 | 31,62 | 30,52 |
| 1 | 38,00 | 31,70 |
| 1 | 32,18 | 32,24 |
| 1 | 32,74 | 32,40 |

**Table S11.** Summary of results of limit of detection analyses for the Pan-Chlamydiales, *C. abortus*/ *C. pecorum* and *P. acanthamoeba*/ *W. chondrophila* qPCR assays using extracted DNA of placenta, stomach content and lung spiked with decreasing concentrations of synthetic controls. Ca=*Chlamydia abortus*, Cp=*Chlamydia pecorum*, Pa=*Parachlamydia acanthamoeba*, Wc=*Waddlia chondrophila*.

| qPCR assay                                      | Spiked DNA sample |                 |            |
|-------------------------------------------------|-------------------|-----------------|------------|
|                                                 | Placenta          | Stomach content | Lung       |
|                                                 | DNA copies        | DNA copies      | DNA copies |
| Pan-Chlamydiales                                | <62.5             | <62.5           | <125       |
| <i>C. abortus</i> / <i>C. pecorum</i>           | 5                 | 5               | 2          |
| <i>P. acanthamoeba</i> / <i>W. chondrophila</i> | Pa: <1<br>Wc: 1   | <1              | <1         |
