# Supplementary material for: Optimization and Application of Real-Time qPCR Assays in Detection and Identification of Chlamydiales in Products of Domestic Ruminant Abortion
Source: MDPI journal article supplement (doi:10.3390/pathogens12020290), 2023-02-09
Supplement: s1 [file s1]

**Table S1.** Sequences (5' to 3') of synthetic controls used for the optimisation of the Pan-Chlamydiales assay and the *C. abortus*/*C. pecorum* and *P. acanthamoeba*/*W. chondrophila* assays.

| Synthetic controls                                                                                      | Sequence (5' to 3')                                                                                                                                                                                                                                                                                                                                                                                                                                                                                                                                                                                         |
|---------------------------------------------------------------------------------------------------------|-------------------------------------------------------------------------------------------------------------------------------------------------------------------------------------------------------------------------------------------------------------------------------------------------------------------------------------------------------------------------------------------------------------------------------------------------------------------------------------------------------------------------------------------------------------------------------------------------------------|
| Pan-Chlamydiales assay                                                                                  | CCG CCA ACA CTG GGA CTG AGA CAC TGC CCA GAC<br>TTC TAC GGA AGG CTG CAG TCG AGA ATC TTT CGC<br>AAT GGA CGA AAG TCT GAC GAA GCG ACG CCG CGT<br>GTG TGA TGA AGG CTC TAG GGT TGT AAA GCA CTT<br>TCG CTT GGG AAT AAG AGA GAT TGG CTA ATA TCC<br>AAT CGA TTT GAG CGT ACC AGG TAA AGA AGC ACC<br>GGC TAA CTC C                                                                                                                                                                                                                                                                                                     |
| <i>C. abortus</i> / <i>C. pecorum</i> assay<br><i>P. acanthamoeba</i> / <i>W. chondrophila</i><br>assay | CTC AAC TCC AGA ACA GCA TTT GAA ACT ATA TTT<br>CTT GAG GGT AGG CGG AGA AAA CGG AAT TCC ACA<br>TGT AGC GGT GAA ATG CGT AGA TAT GTG GAA GAA<br>CAT CGG TGG CGA AGG CGG TTT TCT AGC TTA TTC<br>CTG ACG CTG AGA CTA GGC CCT TGG GTC GTA AAG<br>TTC TTT CGC ATG GGA ACA AGA GAA GGA TGC TAA<br>TAT CAT CTG GAT TTG AGC GTA CCT TGT AAA GAA<br>GCA CCG GCT AAC TCC GAC TAG CAA CTG ACA CTA<br>AGT CGG CTA CAA TTA AAT ACC ACG AAT GGC AAG<br>TTG GTT TAG CGC TCT CTT ATC GAT TGA ACA TGC<br>TTG TAC TAC CAT GTG ATC CTT GCG CTA CTT GGT<br>GCG ACG CGA TTA GCT TAC GCG TAG GAT TTT ACG<br>GAG ATT ATG TTT TCG ACA |
