# Supplementary material for: Optimization and Application of Real-Time qPCR Assays in Detection and Identification of Chlamydiales in Products of Domestic Ruminant Abortion
Source: MDPI journal article supplement (doi:10.3390/pathogens12020290), 2023-02-09
Supplement: s1 [file s1]

**Table S12.** Testing of foetal tissue/placenta of known uninfected animals to demonstrate specificity. (Samples from uninfected animals was defined as samples from abortion cases where no typical pathological lesions were noted).

| No. | Primer/Probe            |                    |               |                                                      |           |           |
|-----|-------------------------|--------------------|---------------|------------------------------------------------------|-----------|-----------|
|     | <b>Pan-Chlamydiales</b> | <b>Lab. number</b> | <b>Animal</b> | <b>Pathological lesion</b>                           | <b>Ct</b> | <b>Ct</b> |
| 1   | Placenta                | B01488-18          | Ovine         | None                                                 | 34.57     | 35.23     |
| 2   | Placenta                | B01800-18          | Ovine         | None                                                 | 34.24     | 33.08     |
| 3   | Placenta                | B00920-19          | Ovine         | None                                                 | 30.78     | 29.28     |
| 4   | Placenta                | B01010-19          | Ovine         | Generalised congestion                               | 37.00     | 34.94     |
| 5   | Placenta                | B02033-19          | Ovine         | None                                                 | 33.55     | 32.43     |
| 6   | Stomach content         | B01800-18          | Ovine         | None                                                 | 37.12     | ND        |
| 7   | Stomach content         | B02302-19          | Ovine         | Non-specific                                         | ND        | ND        |
| 8   | Lung                    | B0215-18           | Ovine         | None                                                 | ND        | ND        |
| 9   | Lung                    | B01800-18          | Ovine         | None                                                 | ND        | ND        |
| 10  | Lung                    | B00902-19          | Ovine         | None                                                 | ND        | ND        |
| 11  | Lung                    | B01010-19          | Ovine         | Generalised congestion                               | 12.40     | ND        |
| 12  | Lung                    | B02033-19          | Ovine         | None                                                 | ND        | ND        |
| 13  | Placenta                | B01765-18          | Bovine        | None                                                 | 8.35      | ND        |
| 14  | Placenta                | B02311-18          | Bovine        | None                                                 | 33.95     | ND        |
| 15  | Placenta                | B01167-19          | Bovine        | None                                                 | 34.51     | 32.62     |
| 16  | Placenta                | B01309-19          | Bovine        | None                                                 | 35.56     | 36.71     |
| 17  | Stomach content         | B01259-18          | Bovine        | None                                                 | ND        | ND        |
| 18  | Stomach content         | B01355-18          | Bovine        | None                                                 | 36.26     | ND        |
| 19  | Stomach content         | B01457-18          | Bovine        | None                                                 | ND        | ND        |
| 20  | Stomach content         | B01498-18          | Bovine        | None                                                 | ND        | ND        |
| 21  | Stomach content         | B01499-18          | Bovine        | None                                                 | 21.92     | ND        |
| 22  | Stomach content         | B01631-18          | Bovine        | Splenic necrosis                                     | ND        | ND        |
| 23  | Stomach content         | B01011-19          | Bovine        | None                                                 | 32.93     | 33.75     |
| 24  | Stomach content         | B01431-19          | Bovine        | None                                                 | 36.67     | ND        |
| 25  | Stomach content         | B01482-19          | Bovine        | Epicardial ecchimoses, subcut haemorrhages, anasarca | ND        | ND        |
| 26  | Lung                    | B02311-18          | Bovine        | None                                                 | ND        | 21.12     |
| 27  | Lung                    | B01457-18          | Bovine        | None                                                 | 11.87     | ND        |
| 28  | Lung                    | B01167-19          | Bovine        | None                                                 | 32.82     | 31.71     |
| 29  | Lung                    | B01860-19          | Bovine        | None                                                 | 3.54      | 35.49     |
| 30  | Lung                    | B02063-19          | Bovine        | Nodular liver                                        | 18.18     | 12.44     |
| 31  | Lung                    | B00490-18          | Bovine        | Pulmonary leukostasis                                | ND        | ND        |
| 32  | Lung                    | B00883-19          | Bovine        | Yellow liver                                         | ND        | ND        |
| 33  | Placenta                | B00771-18          | Caprine       | None                                                 | 36.92     | 36.89     |

|    |                          |                    |               |                                        |           |           |
|----|--------------------------|--------------------|---------------|----------------------------------------|-----------|-----------|
| 34 | Placenta                 | B01567-18          | Caprine       | Lung haemorrhages, Hepatic necrosis    | ND        | ND        |
| 35 | Placenta                 | B01582-18          | Caprine       | None                                   | ND        | ND        |
| 36 | Placenta                 | B01756-19          | Caprine       | None                                   | 17.84     | ND        |
| 37 | Placenta                 | B01980-19          | Caprine       | Brain congestion, pericardial effusion | 33.08     | 31.57     |
| 38 | Stomach content          | B01638-18          | Caprine       | Abomasitis, Vascular leucostasis       | 34.13     | 34.60     |
| 39 | Stomach content          | B0876-19           | Caprine       | None                                   | ND        | ND        |
| 40 | Stomach content          | B1456-19           | Caprine       | None                                   | ND        | 12.82     |
| 41 | Stomach content          | B01756-19          | Caprine       | None                                   | ND        | ND        |
| 42 | Stomach content          | B02378-19          | Caprine       | Pleuritis, Hydropericardium            | ND        | ND        |
| 43 | Stomach content          | B01756019          | Caprine       | None                                   | ND        | ND        |
| 44 | Lung                     | B01567-18          | Caprine       | Lung haemorrhages, Hepatic necrosis    | ND        | ND        |
| 45 | Lung                     | B01582-18          | Caprine       | None                                   | 39.05     | ND        |
| 46 | Lung                     | B01638-18          | Caprine       | Abomasitis, Vascular leucostasis       | ND        | ND        |
| 47 | Lung                     | B01456-19          | Caprine       | None                                   | ND        | ND        |
| 48 | Lung                     | B02245-19          | Caprine       | Bacteraemia                            | 36.63     | 5.87      |
| 49 | Lung                     | B02378-19          | Caprine       | Pleuritis, Hydropericardium            | ND        | ND        |
|    |                          |                    |               |                                        |           |           |
|    | <i>Chlamydia abortus</i> | <b>Lab. number</b> | <b>Animal</b> | <b>Pathological lesion</b>             | <b>Ct</b> | <b>Ct</b> |
| 1  | Placenta                 | B01488-18          | Ovine         | None                                   | ND        | ND        |
| 2  | Placenta                 | B01800-18          | Ovine         | None                                   | ND        | 32.23     |
| 3  | Placenta                 | B00920-19          | Ovine         | None                                   | ND        | ND        |
| 4  | Placenta                 | B01010-19          | Ovine         | Generalised congestion                 | ND        | ND        |
| 5  | Placenta                 | B02033-19          | Ovine         | None                                   | 9.26      | 7.17      |
| 6  | Stomach content          | B01800-18          | Ovine         | None                                   | ND        | ND        |
| 7  | Stomach content          | B02302-19          | Ovine         | Non-specific                           | ND        | ND        |
| 8  | Lung                     | B0215-18           | Ovine         | None                                   | ND        | ND        |
| 9  | Lung                     | B01800-18          | Ovine         | None                                   | ND        | ND        |
| 10 | Lung                     | B00902-19          | Ovine         | None                                   | 19.40     | ND        |
| 11 | Lung                     | B01010-19          | Ovine         | Generalised congestion                 | 13.14     | ND        |
| 12 | Lung                     | B02033-19          | Ovine         | None                                   | ND        | ND        |
| 13 | Placenta                 | B01765-18          | Bovine        | None                                   | ND        | ND        |
| 14 | Placenta                 | B02311-18          | Bovine        | None                                   | ND        | ND        |
| 15 | Placenta                 | B01167-19          | Bovine        | None                                   | ND        | ND        |
| 16 | Placenta                 | B01309-19          | Bovine        | None                                   | ND        | 14.07     |

|    |                 |           |         |                                                               |       |       |
|----|-----------------|-----------|---------|---------------------------------------------------------------|-------|-------|
| 17 | Stomach content | B01259-18 | Bovine  | None                                                          | 29.90 | ND    |
| 18 | Stomach content | B01355-18 | Bovine  | None                                                          | ND    | ND    |
| 19 | Stomach content | B01380-18 | Bovine  | None                                                          | 33    | ND    |
| 20 | Stomach content | B01457-18 | Bovine  | None                                                          | ND    | ND    |
| 21 | Stomach content | B01498-18 | Bovine  | None                                                          | ND    | ND    |
| 22 | Stomach content | B01499-18 | Bovine  | None                                                          | ND    | 5.54  |
| 23 | Stomach content | B01631-18 | Bovine  | Splenic necrosis                                              | ND    | ND    |
| 24 | Stomach content | B01011-19 | Bovine  | None                                                          | ND    | ND    |
| 25 | Stomach content | B01431-19 | Bovine  | None                                                          | ND    | 4.49  |
| 26 | Stomach content | B01482-19 | Bovine  | Epicardial<br>ecchimoses, subcut<br>haemorrhages,<br>anasarca | ND    | ND    |
| 27 | Lung            | B00470-18 | Bovine  | Pulmonary<br>leukostasis                                      | ND    | ND    |
| 28 | Lung            | B02311-18 | Bovine  | None                                                          | 10.21 | ND    |
| 29 | Lung            | B01167-19 | Bovine  | None                                                          | 3.68  | ND    |
| 30 | Lung            | B01457-19 | Bovine  | None                                                          | ND    | ND    |
| 31 | Lung            | B01498-19 | Bovine  | None                                                          | ND    | 14.52 |
| 32 | Lung            | B01860-19 | Bovine  | None                                                          | 15    | ND    |
| 33 | Lung            | B02063-19 | Bovine  | Nodular liver                                                 | 35.79 | ND    |
| 34 | Placenta        | B00771-18 | Caprine | None                                                          | ND    | ND    |
| 35 | Placenta        | B01567-18 | Caprine | Lung<br>haemorrhages,<br>Hepatic necrosis                     | ND    | ND    |
| 36 | Placenta        | B01582-18 | Caprine | None                                                          | ND    | 5.13  |
| 37 | Placenta        | B01756-19 | Caprine | None                                                          | 4.91  | 8.72  |
| 38 | Placenta        | B02593-19 | Caprine | Brain congestion,<br>pericardial effusion                     | ND    | ND    |
| 39 | Stomach content | B01638-18 | Caprine | Abomasitis,<br>Vascular leucostasis                           | 35.10 | ND    |
| 40 | Stomach content | B0876-19  | Caprine | None                                                          | 13.02 | ND    |
| 41 | Stomach content | B1456-19  | Caprine | None                                                          | ND    | ND    |
| 42 | Stomach content | B02378-19 | Caprine | Pleuritis,<br>Hydropericardium                                | ND    | 5.64  |
| 43 | Stomach content | B01756-19 | Caprine | None                                                          | ND    | ND    |
| 44 | Lung            | B01567-18 | Caprine | Lung<br>haemorrhages,<br>Hepatic necrosis                     | ND    | ND    |
| 45 | Lung            | B01582-18 | Caprine | None                                                          | 3.14  | ND    |
| 46 | Lung            | B01638-18 | Caprine | Abomasitis,<br>Vascular leucostasis                           | 16.72 | ND    |
| 47 | Lung            | B01456-19 | Caprine | None                                                          | ND    | ND    |
| 48 | Lung            | B02245-19 | Caprine | Bacteraemia                                                   | ND    | ND    |
| 49 | Lung            | B02378-19 | Caprine | Pleuritis,<br>Hydropericardium                                | ND    | ND    |

|    | <i>Chlamydia pecorum</i> | Lab. number | Animal  | Pathological lesion                                  | Ct | Ct |
|----|--------------------------|-------------|---------|------------------------------------------------------|----|----|
| 1  | Placenta                 | B01488-18   | Ovine   | None                                                 | ND | ND |
| 2  | Placenta                 | B01800-18   | Ovine   | None                                                 | ND | ND |
| 3  | Placenta                 | B00920-19   | Ovine   | None                                                 | ND | ND |
| 4  | Placenta                 | B01010-19   | Ovine   | Generalised congestion                               | ND | ND |
| 5  | Placenta                 | B02033-19   | Ovine   | None                                                 | ND | ND |
| 6  | Stomach content          | B01800-18   | Ovine   | None                                                 | ND | ND |
| 7  | Stomach content          | B02302-19   | Ovine   |                                                      | ND | ND |
| 8  | Lung                     | B0215-18    | Ovine   | None                                                 | ND | ND |
| 9  | Lung                     | B01800-18   | Ovine   | None                                                 | ND | ND |
| 10 | Lung                     | B00902-19   | Ovine   | None                                                 | ND | ND |
| 11 | Lung                     | B01010-19   | Ovine   | Generalised congestion                               | ND | ND |
| 12 | Lung                     | B02033-19   | Ovine   | None                                                 | ND | ND |
| 13 | Placenta                 | B01765-18   | Bovine  | None                                                 | ND | ND |
| 14 | Placenta                 | B02311-18   | Bovine  | None                                                 | ND | ND |
| 15 | Placenta                 | B01167-19   | Bovine  | None                                                 | ND | ND |
| 16 | Placenta                 | B01309-19   | Bovine  | None                                                 | ND | ND |
| 17 | Stomach content          | B01259-18   | Bovine  | None                                                 | ND | ND |
| 18 | Stomach content          | B01355-18   | Bovine  | None                                                 | ND | ND |
| 19 | Stomach content          | B01380-18   | Bovine  | None                                                 | ND | ND |
| 20 | Stomach content          | B01457-18   | Bovine  | None                                                 | ND | ND |
| 21 | Stomach content          | B01498-18   | Bovine  | None                                                 | ND | ND |
| 22 | Stomach content          | B01499-18   | Bovine  | None                                                 | ND | ND |
| 23 | Stomach content          | B01631-18   | Bovine  | Splenic necrosis                                     | ND | ND |
| 24 | Stomach content          | B1011-19    | Bovine  | None                                                 | ND | ND |
| 25 | Stomach content          | B01431-19   | Bovine  | None                                                 | ND | ND |
| 26 | Stomach content          | B01482-19   | Bovine  | Epicardial ecchimoses, subcut haemorrhages, anasarca | ND | ND |
| 27 | Lung                     | B0490-18    | Bovine  | Pulmonary leukostasis                                | ND | ND |
| 28 | Lung                     | B00883-19   | Bovine  | Yellow lung                                          | ND | ND |
| 29 | Lung                     | B01167-19   | Bovine  | None                                                 | ND | ND |
| 30 | Lung                     | B01457-18   | Bovine  | None                                                 | ND | ND |
| 31 | Lung                     | B01860-19   | Bovine  | None                                                 | ND | ND |
| 32 | Lung                     | B02063-19   | Bovine  | Nodular liver                                        | ND | ND |
| 33 | Lung                     | B02311-18   | Bovine  | None                                                 | ND | ND |
| 34 | Placenta                 | B00771-18   | Caprine | None                                                 | ND | ND |

|    |                                   |                    |               |                                        |           |           |
|----|-----------------------------------|--------------------|---------------|----------------------------------------|-----------|-----------|
| 35 | Placenta                          | B01567-18          | Caprine       | Lung haemorrhages, Hepatic necrosis    | ND        | ND        |
| 36 | Placenta                          | B01582-18          | Caprine       | None                                   | ND        | ND        |
| 37 | Placenta                          | B01756-19          | Caprine       | None                                   | ND        | ND        |
| 38 | Placenta                          | B01980-19          | Caprine       | Brain congestion, pericardial effusion | ND        | ND        |
| 39 | Stomach content                   | B01638-18          | Caprine       | Abomasitis, Vascular leucostasis       | ND        | ND        |
| 40 | Stomach content                   | B0876-19           | Caprine       | None                                   | ND        | ND        |
| 41 | Stomach content                   | B1456-19           | Caprine       | None                                   | ND        | ND        |
| 42 | Stomach content                   | B02378-19          | Caprine       | Pleuritis, Hydropericardium            |           |           |
| 43 | Stomach content                   | B01756-19          | Caprine       | None                                   | ND        | ND        |
| 44 | Lung                              | B01567-18          | Caprine       | Lung haemorrhages, Hepatic necrosis    | ND        | ND        |
| 45 | Lung                              | B01582-18          | Caprine       | None                                   | ND        | ND        |
| 46 | Lung                              | B01638-18          | Caprine       | Abomasitis, Vascular leucostasis       | ND        | ND        |
| 47 | Lung                              | B01456-19          | Caprine       | None                                   | ND        | ND        |
| 48 | Lung                              | B02245-19          | Caprine       | Bacteraemia                            | ND        | ND        |
| 49 | Lung                              | B02378-19          | Caprine       | Pleuritis, Hydropericardium            | ND        | ND        |
|    |                                   |                    |               |                                        |           |           |
|    | <i>Parachlamydia acanthamoeba</i> | <b>Lab. number</b> | <b>Animal</b> | <b>Pathological lesion</b>             | <b>Ct</b> | <b>Ct</b> |
| 1  | Placenta                          | B01488-18          | Ovine         | None                                   | 36.49     | 36.67     |
| 2  | Placenta                          | B01800-18          | Ovine         | None                                   | 36.60     | 35.44     |
| 3  | Placenta                          | B00920-19          | Ovine         | None                                   | 35.53     | ND        |
| 4  | Placenta                          | B01010-19          | Ovine         | Generalised congestion                 | 35.65     | 37.02     |
| 5  | Placenta                          | B02033-19          | Ovine         | None                                   | 36.89     | 34.98     |
| 6  | Stomach content                   | B01800-18          | Ovine         | None                                   | 35.75     | 36.95     |
| 7  | Stomach content                   | B02302-19          | Ovine         | Non-specific                           | ND        | ND        |
| 8  | Lung                              | B0215-18           | Ovine         | None                                   | 36.78     | 36.07     |
| 9  | Lung                              | B01800-18          | Ovine         | None                                   | 35.50     | 35.88     |
| 10 | Lung                              | B00902-19          | Ovine         | None                                   | 34.93     | 34.10     |
| 11 | Lung                              | B01010-19          | Ovine         | Generalised congestion                 | 36.69     | 37.02     |
| 12 | Lung                              | B02033-19          | Ovine         | None                                   | 35.92     | 35.61     |
| 13 | Placenta                          | B01765-18          | Bovine        | None                                   | 34.36     | 35.84     |
| 14 | Placenta                          | B02311-18          | Bovine        | None                                   | 34.54     | 35.22     |
| 15 | Placenta                          | B01167-19          | Bovine        | None                                   | 35.79     | ND        |
| 16 | Placenta                          | B01309-19          | Bovine        | None                                   | 35.99     | 37.05     |

|    |                 |           |         |                                                               |       |       |
|----|-----------------|-----------|---------|---------------------------------------------------------------|-------|-------|
| 17 | Stomach content | B01259-18 | Bovine  | None                                                          | 33.78 | 30.99 |
| 18 | Stomach content | B01355-18 | Bovine  | None                                                          | 35.49 | 33.56 |
| 19 | Stomach content | B01457-18 | Bovine  | None                                                          | 35.32 | 35.85 |
| 20 | Stomach content | B01498-18 | Bovine  | None                                                          | 35.04 | 33.07 |
| 21 | Stomach content | B01499-18 | Bovine  | None                                                          | 36.33 | 36.94 |
| 22 | Stomach content | B01631-18 | Bovine  | Splenic necrosis                                              | ND    | 35.51 |
| 23 | Stomach content | B1011-19  | Bovine  | None                                                          | 35.86 | 36.12 |
| 24 | Stomach content | B01431-19 | Bovine  | None                                                          | 36.39 | ND    |
| 25 | Stomach content | B01482-19 | Bovine  | Epicardial<br>ecchimoses, subcut<br>haemorrhages,<br>anasarca | 36.53 | 35.92 |
| 26 | Lung            | B00490-18 | Bovine  | Pulmonary<br>leukostasis                                      | 36.78 | 36.07 |
| 27 | Lung            | B00883018 | Bovine  | Yellow liver                                                  | 34.93 | 34.10 |
| 28 | Lung            | B02311-18 | Bovine  | None                                                          | 35.88 | 35.33 |
| 29 | Lung            | B01167-19 | Bovine  | None                                                          | 36.83 | 36.11 |
| 30 | Lung            | B01457-18 | Bovine  | None                                                          | 35.32 | 35.85 |
| 31 | Lung            | B01496-19 | Bovine  | Viral placentitis                                             | 34.94 | 36.05 |
| 32 | Lung            | B01860-19 | Bovine  | None                                                          | 35.42 | 36.45 |
| 33 | Lung            | B02063-19 | Bovine  | Nodular liver                                                 | 34.98 | 34.88 |
| 34 | Placenta        | B00771-18 | Caprine | None                                                          | 35.82 | 36.07 |
| 35 | Placenta        | B01567-18 | Caprine | Lung<br>haemorrhages,<br>Hepatic necrosis                     | ND    | 35.57 |
| 36 | Placenta        | B01582-18 | Caprine | None                                                          | ND    | ND    |
| 37 | Placenta        | B01756-19 | Caprine | None                                                          | 33.27 | 36.05 |
| 38 | Placenta        | B02593-19 | Caprine | Brain congestion,<br>pericardial effusion                     | 35.98 | 36.13 |
| 39 | Stomach content | B01638-18 | Caprine | Abomasitis,<br>Vascular leucostasis                           | 36.43 | 36.31 |
| 40 | Stomach content | B0876-19  | Caprine | None                                                          | 36.79 | 36.12 |
| 41 | Stomach content | B1456-19  | Caprine | None                                                          | 36.07 | 35.35 |
| 42 | Stomach content | B02378-19 | Caprine | Pleuritis,<br>Hydropericardium                                | 35.89 | 35.97 |
| 43 | Stomach content | B01756-19 | Caprine | None                                                          | 32.75 | 35.57 |
| 44 | Lung            | B01567-18 | Caprine | Lung<br>haemorrhages,<br>Hepatic necrosis                     | 35.92 | ND    |
| 45 | Lung            | B01582-18 | Caprine | None                                                          | ND    | 35.58 |
| 46 | Lung            | B01638-18 | Caprine | Abomasitis,<br>Vascular leucostasis                           | 35.36 | 35.46 |
| 47 | Lung            | B01456-19 | Caprine | None                                                          | 36.10 | 35.96 |
| 48 | Lung            | B02245-19 | Caprine | Bacteraemia                                                   | 35.83 | 36.03 |
| 49 | Lung            | B02378-19 | Caprine | Pleuritis,<br>Hydropericardium                                | 34.78 | 36.92 |

|    | <i>Waddlia chondrophila</i> | Lab. number | Animal  | Pathological lesion                                  | Ct    | Ct |
|----|-----------------------------|-------------|---------|------------------------------------------------------|-------|----|
| 1  | Placenta                    | B01488-18   | Ovine   | None                                                 | ND    | ND |
| 2  | Placenta                    | B01800-18   | Ovine   | None                                                 | ND    | ND |
| 3  | Placenta                    | B00920-19   | Ovine   | None                                                 | ND    | ND |
| 4  | Placenta                    | B01010-19   | Ovine   | Generalised congestion                               | ND    | ND |
| 5  | Placenta                    | B02033-19   | Ovine   | None                                                 | ND    | ND |
| 6  | Stomach content             | B01800-18   | Ovine   | None                                                 | ND    | ND |
| 7  | Stomach content             | B02302-19   | Ovine   | Non-specific                                         | ND    | ND |
| 8  | Lung                        | B0215-18    | Ovine   | None                                                 | ND    | ND |
| 9  | Lung                        | B01800-18   | Ovine   | None                                                 | ND    | ND |
| 10 | Lung                        | B00902-19   | Ovine   | None                                                 | ND    | ND |
| 11 | Lung                        | B01010-19   | Ovine   | Generalised congestion                               | ND    | ND |
| 12 | Lung                        | B02033-19   | Ovine   | None                                                 | ND    | ND |
| 13 | Placenta                    | B01765-18   | Bovine  | None                                                 | ND    | ND |
| 14 | Placenta                    | B02311-18   | Bovine  | None                                                 | ND    | ND |
| 15 | Placenta                    | B01167-19   | Bovine  | None                                                 | ND    | ND |
| 16 | Placenta                    | B01309-19   | Bovine  | None                                                 | ND    | ND |
| 17 | Stomach content             | B01259-18   | Bovine  | None                                                 | ND    | ND |
| 18 | Stomach content             | B01355-18   | Bovine  | None                                                 | ND    | ND |
| 19 | Stomach content             | B01457-18   | Bovine  | None                                                 | 34.29 | ND |
| 20 | Stomach content             | B01498-18   | Bovine  | None                                                 | ND    | ND |
| 21 | Stomach content             | B01499-18   | Bovine  | None                                                 | ND    | ND |
| 22 | Stomach content             | B01631-18   | Bovine  | Splenic necrosis                                     | ND    | ND |
| 23 | Stomach content             | B01011-19   | Bovine  | None                                                 | ND    | ND |
| 24 | Stomach content             | B01431-19   | Bovine  | None                                                 | ND    | ND |
| 25 | Stomach content             | B01482-19   | Bovine  | Epicardial ecchimoses, subcut haemorrhages, anasarca | ND    | ND |
| 26 | Lung                        | B00490-18   | Bovine  | Pulmonary leukostasis                                | ND    | ND |
| 27 |                             |             |         |                                                      |       |    |
| 28 | Lung                        | B02311-18   | Bovine  | None                                                 | ND    | ND |
| 29 | Lung                        | B01167-19   | Bovine  | None                                                 | ND    | ND |
| 30 | Lung                        | B01457-18   | Bovine  | None                                                 | ND    | ND |
| 31 | Lung                        | B01498-19   | Bovine  | None                                                 | ND    | ND |
| 32 | Lung                        | B01860-19   | Bovine  | None                                                 | ND    | ND |
| 33 | Lung                        | B02063-19   | Bovine  | Nodular liver                                        | ND    | ND |
| 34 | Placenta                    | B00771-18   | Caprine | None                                                 | ND    | ND |
| 35 | Placenta                    | B01567-18   | Caprine | Lung haemorrhages, Hepatic necrosis                  | ND    | ND |

|    |                 |           |         |                                           |    |    |
|----|-----------------|-----------|---------|-------------------------------------------|----|----|
| 36 | Placenta        | B01582-18 | Caprine | None                                      | ND | ND |
| 37 | Placenta        | B01756-19 | Caprine | None                                      | ND | ND |
| 38 | Placenta        | B01980-19 | Caprine | Brain congestion,<br>pericardial effusion | ND | ND |
| 39 | Stomach content | B01638-18 | Caprine | Abomasitis,<br>Vascular leucostasis       | ND | ND |
| 40 | Stomach content | B0876-19  | Caprine | None                                      | ND | ND |
| 41 | Stomach content | B1456-19  | Caprine | None                                      | ND | ND |
| 42 | Stomach content | B02378-19 | Caprine | Pleuritis,<br>Hydropericardium            | ND | ND |
| 43 | Stomach content | B01756-19 | Caprine | None                                      | ND | ND |
| 44 | Lung            | B01567-18 | Caprine | Lung<br>haemorrhages,<br>Hepatic necrosis | ND | ND |
| 45 | Lung            | B01582-18 | Caprine | None                                      | ND | ND |
| 46 | Lung            | B01638-18 | Caprine | Abomasitis,<br>Vascular leucostasis       | ND | ND |
| 47 | Lung            | B01456-19 | Caprine | None                                      | ND | ND |
| 48 | Lung            | B02245-19 | Caprine | Bacteraemia                               | ND | ND |
| 49 | Lung            | B02378-19 | Caprine | Pleuritis,<br>Hydropericardium            | ND | ND |
